# Supplementary material for: Identification of Immunoglobulin Gene Rearrangement Biomarkers in Multiple Myeloma through cfDNA-Based Liquid Biopsy Using tchDNA-Seq
Source: MDPI journal article supplement (doi:10.3390/cancers15112911), 2023-05-25
Supplement: s1 [file s1]

*Supp. Table S1.* Summary of the 43 genes included in the targeted capture-hybridization DNA panel.

| # Genes |          |          |       |        |
|---------|----------|----------|-------|--------|
| ADAMTS7 | DDB1     | HIST1H1E | PDZK1 | TRIM42 |
| ATM     | DGKK     | IRF4     | PGR   | XBP1   |
| ATR     | DIS3     | KRAS     | PRKD2 | ZFHX4  |
| BCL7A   | EGR1     | LTB      | PRMD1 |        |
| BRAF    | ERCC1    | MAX      | PSMC2 |        |
| CCND1   | FAM46C   | MLH1     | PSMC6 |        |
| CD19    | FGFR3    | MYO10    | PSMD1 |        |
| CDKN2A  | FGFR4    | NFBK2    | RB1   |        |
| CDKN2C  | HIST1H1B | NRAS     | TP53  |        |
| CYLD    | HIST1H1C | NRM      | TRAF3 |        |
