# Supplementary material for: Identification of Immunoglobulin Gene Rearrangement Biomarkers in Multiple Myeloma through cfDNA-Based Liquid Biopsy Using tchDNA-Seq
Source: MDPI journal article supplement (doi:10.3390/cancers15112911), 2023-05-25
Supplement: s1 [file s1]

*Supp. Table S2.* Summary of the frequency and alteration data collected on all sample fractions analyzed.

| Patient ID | Components | Alteration   | Mutation           | VAF PPC | VAF cfDNA | VAF BM |
|------------|------------|--------------|--------------------|---------|-----------|--------|
| MM61       | PPC+BM     | KRAS         | p.Gly12Asp         | 0.037   | -         | 0.01   |
|            | PPC+BM     | NRAS         | p.Gln61Arg         | 0.015   | -         | 0.023  |
|            | PPC+BM     | NRAS         | p.Gln61Lys         | 0.023   | -         | 0.012  |
|            | PPC+BM     | NRAS         | p.Gly12Cys         | 0.025   | -         | 0.004  |
|            | PPC+BM     | IGHV4_D6_J4  | -                  | 0.065   | -         | 0.211  |
|            | PPC+BM     | IGKV1_J4     | -                  | 0.229   | -         | 0.246  |
|            | PPC+BM     | IGKV1_J5     | -                  | 0.667   | -         | 0.439  |
| MM63       | PPC+BM     | KRAS         | p.Gln61His         | 0.199   | -         | 0.005  |
|            | PPC+BM     | IGHV2_D2_J5  | -                  | 0.429   | -         | 0      |
|            | PPC+BM     | IGHV3_Unk_J4 | -                  | 0.019   | -         | 0      |
|            | PPC+BM     | IGKV1_J4     | -                  | 0.014   | -         | 0      |
|            | PPC+BM     | IGKV1_J4     | -                  | 0.514   | -         | 0      |
| MM67       | PPC+BM     | t(11,14)     | -                  | 0.014   | -         | 0.026  |
|            | PPC+BM     | ZFHX4        | p.Gly672Ser        | 0.542   | -         | 0.555  |
| MM88       | PPC+BM     | BRAF         | p.Lys601Asn        | 0.013   | -         | 0.004  |
|            | PPC+BM     | BRAF         | p.Phe595Leu        | 0.047   | -         | 0.016  |
|            | PPC+BM     | NRAS         | p.Gln61His         | 0.283   | -         | 0.033  |
|            | PPC+BM     | PGR          | p.Leu495Arg        | 0.024   | -         | -      |
|            | PPC+BM     | IGHV1_D1_J4  | -                  | 0       | -         | 0.11   |
|            | PPC+BM     | IGHV3_D4_J6  | -                  | 0.993   | -         | 0.644  |
|            | PPC+BM     | IGH_D5_J4    | -                  | 0       | -         | 0.096  |
| MM99       | PPC+BM     | NRAS         | p.Gly13Asp         | 0.067   | -         | 0.03   |
|            | PPC+BM     | TENT5C       | p.Arg301GlufsTer25 | 0.069   | -         | 0.006  |
|            | PPC+BM     | TENT5C       | p.Ile186GlufsTer12 | 0.103   | -         | 0.038  |
|            | PPC+BM     | TRAF3        | p.Cys76Phe         | 0.159   | -         | 0.048  |
|            | PPC+BM     | TRAF3        | p.Ser84Ter         | 0.078   | -         | 0.032  |
|            | PPC+BM     | IGHV3_D3_J4  | -                  | 0.954   | -         | 0.759  |
|            | PPC+BM     | IGHV3_D4_J4  | -                  | 0.011   | -         | 0      |
|            | PPC+BM     | IGKV1_J1     | -                  | 0.011   | -         | 0      |
| MM101      | PPC+BM     | CYLD         | p.Cys799Ser        | 0.051   | -         | 0      |
|            | PPC+BM     | CYLD         | p.Thr35HisfsTer12  | 0.108   | -         | 0.02   |
|            | PPC+BM     | t(11,14)     | -                  | 0.804   | -         | 0.309  |
|            | PPC+BM     | IGHV2_D4_J3  | -                  | 0       | -         | 0.024  |
|            | PPC+BM     | IGHV3_D4_J5  | -                  | 0.985   | -         | 0.919  |
|            | PPC+BM     | IGKV1_J3     | -                  | 0       | -         | 0.024  |
| MM104      | PPC+BM     | CCND1        | p.Ser41Pro         | 0.059   | -         | 0.179  |
|            | PPC+BM     | DIS3         | p.Asp479Gly        | 0.044   | -         | 0.125  |
|            | PPC+BM     | IRF4         | p.Lys123Arg        | 0.052   | -         | 0.144  |
|            | PPC+BM     | KRAS         | p.Gln61His         | 0.03    | -         | 0.11   |
|            | PPC+BM     | t(11,14)     | -                  | 0.04    | -         | 0.161  |
|            | PPC+BM     | IGHV1_Unk_J5 | -                  | 0       | -         | 0.023  |
|            | PPC+BM     | IGHV3_D4_J4  | -                  | 0.571   | -         | 0.764  |
|            | PPC+BM     | IGHV3_D6_J4  | -                  | 0.104   | -         | 0      |
|            | PPC+BM     | IGKV1_J4     | -                  | 0.221   | -         | 0.155  |
| MM108      | PPC+BM     | BRAF         | p.Val600Glu        | 0.022   | -         | 0.017  |
|            | PPC+BM     | IGHV1_D4_J4  | -                  | 0.8     | -         | 0.233  |
|            | PPC+BM     | IGHV1_Unk_J5 | -                  | 0       | -         | 0.116  |
|            | PPC+BM     | IGKV1_J2     | -                  | 0       | -         | 0.116  |

**Supp. Table S2.** *Cont.*

| Patient ID | Components   | Alteration    | Mutation    | VAF PPC | VAF cfDNA | VAF BM |
|------------|--------------|---------------|-------------|---------|-----------|--------|
| MM111      | PPC+BM       | NRAS          | p.Gly13Arg  | 0.136   | -         | 0.02   |
|            | PPC+BM       | IGHV3_D1_J6   | -           | 0.019   | -         | 0      |
|            | PPC+BM       | IGHV4_D2_J6   | -           | 0       | -         | 0.125  |
|            | PPC+BM       | IGHV4_D5_J4   | -           | 0.647   | -         | 0.375  |
|            | PPC+BM       | IGKV1_J2      | -           | 0.027   | -         | 0      |
|            | PPC+BM       | IGKV1_J2      | -           | 0.252   | -         | 0      |
| MM119      | PPC+BM       | IRF4          | p.Asn102Lys | 0.318   | -         | 0.142  |
|            | PPC+BM       | IGHV3_D3_J3   | -           | 1       | -         | 0.712  |
|            | PPC+BM       | IGKV1_J4      | -           | 0       | -         | 0.288  |
| MM126      | PPC+BM       | NRAS          | p.Gln61Leu  | 0.13    | -         | 0.04   |
|            | PPC+BM       | t(11,14)      | -           | 0.147   | -         | 0.05   |
|            | PPC+BM       | IGHV1_D1_J4   | -           | 0.888   | -         | 0.895  |
| MM103      | PPC+BM+cfDNA | NRAS          | p.Gln61Arg  | 0.093   | 0.001     | 0.019  |
| MM107      | PPC+BM+cfDNA | KRAS          | p.Gln61His  | 0.232   | 0,04      | 0.029  |
|            | PPC+BM+cfDNA | IGHV3_D1_J6   | -           | 0.075   | 0         | 0      |
|            | PPC+BM+cfDNA | IGHV3_D6_J4   | -           | 0       | 0         | 0.125  |
|            | PPC+BM+cfDNA | IGHV3_Unk_J6  | -           | 0.209   | 0         | 0      |
|            | PPC+BM+cfDNA | IGHV4_D2_J4   | -           | 0       | 0         | 0.2    |
|            | PPC+BM+cfDNA | IGKV1_J3      | -           | 0.552   | 0         | 0.15   |
| MM117      | PPC+BM+cfDNA | BRAF          | p.Arg735Leu | 0.017   | 0         | 0.002  |
|            | PPC+BM+cfDNA | BRAF          | p.Gly455Trp | 0.014   | 0.003     | 0      |
|            | PPC+BM+cfDNA | DIS3          | p.Asp479Glu | 0.059   | 0.001     | 0.012  |
|            | PPC+BM+cfDNA | KRAS          | p.Gln61His  | 0.145   | 0         | 0.022  |
|            | PPC+BM+cfDNA | KRAS          | p.Gly12Val  | 0.065   | 0         | 0.01   |
|            | PPC+BM+cfDNA | RB1           | p.Pro371Thr | 0.013   | 0.005     | 0      |
|            | PPC+BM+cfDNA | IGHV3_D2_J2   | -           | 0.008   | 0         | 0      |
|            | PPC+BM+cfDNA | IGHV3_D2_J2   | -           | 0.06    | 0         | 0      |
|            | PPC+BM+cfDNA | IGHV3_Unk_J6  | -           | 0.76    | 0         | 0.781  |
|            | PPC+BM+cfDNA | IGKV1_J5      | -           | 0.15    | 0         | 0.098  |
|            | PPC+BM+cfDNA | t(11,14)      | -           | 0.527   | 0         | 0.076  |
| MM125      | PPC+BM+cfDNA | NRAS          | p.Gln61Arg  | 0.184   | 0.006     | 0.267  |
|            | PPC+BM+cfDNA | TENT5C        | p.Leu29His  | 0.039   | 0.001     | 0.257  |
|            | PPC+BM+cfDNA | IGHV3_D2_J4   | -           | 0.123   | 0         | 0.113  |
|            | PPC+BM+cfDNA | IGKV1_J4      | -           | 0.857   | 1         | 0.864  |
| MM129      | PPC+BM+cfDNA | PRKD2         | p.Ala578Ser | 0.015   | 0.001     | 0.004  |
|            | PPC+BM+cfDNA | IGHV1/3_D2_J6 | -           | 0.02    | 0         | 0      |
|            | PPC+BM+cfDNA | IGHV3_D4_J4   | -           | 0.815   | 0.889     | 0.634  |
|            | PPC+BM+cfDNA | IGKV3_J4      | -           | 0.156   | 0         | 0.254  |
| MM36       | cfDNA        | BRAF          | p.Gly32Arg  | -       | 0.081     | -      |
|            | PPC+cfDNA    | KRAS          | p.Gln61His  | 0.172   | 0.0005    | -      |
|            | PPC+cfDNA    | KRAS          | p.Gly12Asp  | 0.066   | 0.001     | -      |
|            | PPC+cfDNA    | IGHV3_Unk_J4  | -           | 0.875   | 0         | -      |
| MM46       | PPC+cfDNA    | CDKN2C        | p.Gly137Val | 0.23    | 0.01      | -      |
|            | PPC+cfDNA    | KRAS          | p.Gly12Asp  | 0.51    | 0.033     | -      |
|            | PPC+cfDNA    | TP53          | p.Arg213Gln | 0.12    | 0.008     | -      |
|            | PPC+cfDNA    | IGHV1_D7_J1   | -           | 0       | 0.571     | -      |

**Supp. Table S2.** *Cont.*

| Patient ID | Components | Alteration      | Mutation    | VAF PPC | VAF cfDNA | VAF BM |
|------------|------------|-----------------|-------------|---------|-----------|--------|
| MM57       | PPC+cfDNA  | BRAF            | p.Glu228Ter | 0.011   | 0.0003    | -      |
|            | PPC+cfDNA  | RB1             | p.Ser816Ter | 0.043   | 0.002     | -      |
|            | PPC+cfDNA  | IGHV3_D4_J4     | -           | 0.529   | 0         | -      |
|            | PPC+cfDNA  | IGHV4_D5/2_J5/4 | -           | 0.451   | 0         | -      |
| MM60       | PPC+cfDNA  | KRAS            | p.Gly12Asp  | 0.093   | 0.0009    | -      |
|            | PPC+cfDNA  | IGHV3_D6_J4     | -           | 0       | 0.281     | -      |
|            | PPC+cfDNA  | IGHV4_D3_J4/5   | -           | 0       | 0.188     | -      |
|            | PPC+cfDNA  | IGHV4_D3_J4/5   | -           | 0.824   | 0         | -      |
| MM65       | PPC+cfDNA  | BRAF            | p.Val600Glu | 0.378   | 0.006     | -      |
|            | PPC+cfDNA  | IGHV3_D6_J4     | -           | 0       | 0.185     | -      |
|            | PPC+cfDNA  | IGHV4_D3_J4     | -           | 0       | 0.185     | -      |
|            | PPC+cfDNA  | IGHV5_D2_J6     | -           | 0.738   | 0         | -      |
|            | PPC+cfDNA  | IGKV1_J4        | -           | 0.119   | 0.185     | -      |
| MM100      | PPC+cfDNA  | DIS3            | p.Cys814Trp | 0.57    | 0.04      | -      |
|            | PPC+cfDNA  | NRAS            | p.Gln61Arg  | 0.288   | 0.034     | -      |
|            | PPC+cfDNA  | t(11,14)        | -           | 0.085   | 0.003     | -      |
|            | PPC+cfDNA  | IGHV4_D1_J4     | -           | 0.919   | 0.769     | -      |
|            | PPC+cfDNA  | IGHV1_D7_J1     | -           | 0       | 0.154     | -      |
|            | PPC        | IGKV1_J2        | -           | 0.044   | -         | -      |
| MM118      | PPC+cfDNA  | BRAF            | p.Val600Glu | 0.104   | 0.001     | -      |
|            | PPC+cfDNA  | IGHV3_D1_J4     | -           | 0.368   | 0         | -      |

**Abbreviations:** PPC—pathogenic plasma cells; BM—bone marrow; cfDNA—cell-free DNA; VAF—variant allele frequency.
